# Supplementary figures and images for: Ror2 modulates the canonical Wnt signaling in lung epithelial cells through cooperation with Fzd2
Source: Springer Nature journal article supplement (doi:10.1186/1471-2199-9-11), 2008-01-23

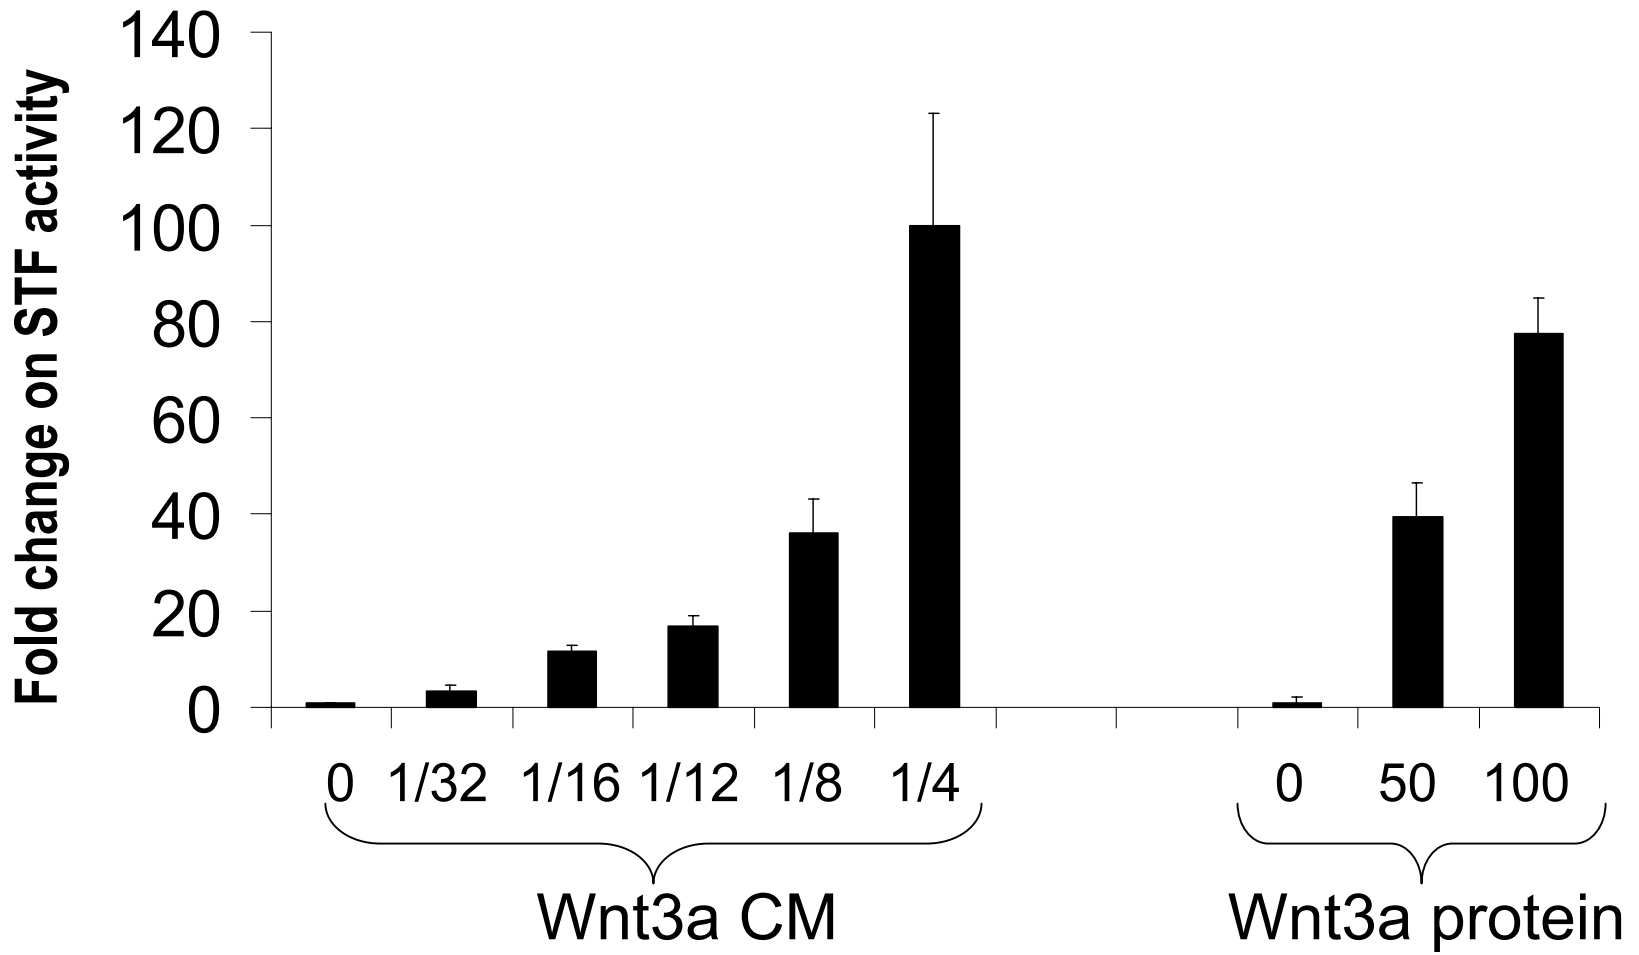

Supplement: Additional file 2 [file 1471-2199-9-11-s2.pdf]
